# Supplementary material
Source: Springer Nature journal article supplement (https://www.springermedizin.de/resource/supplementary/13049_2011_297_MOESM3_ESM.pdf/9666294)

**A****Good**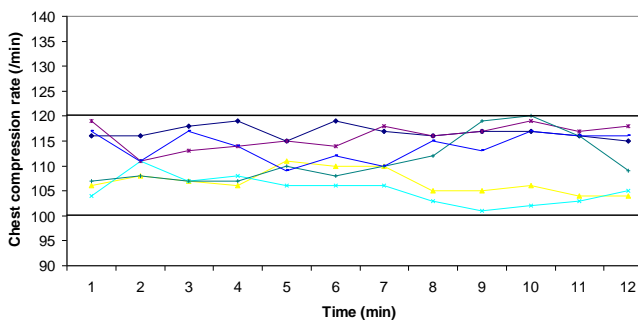**B****Bad**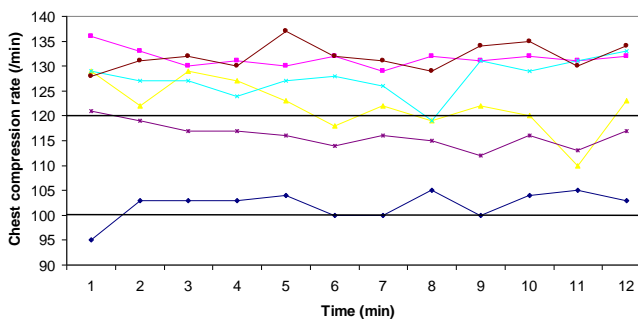**C****Decay**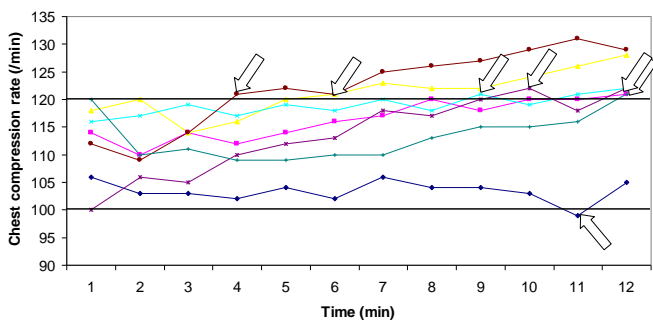

Supplement: MOESM3 [file 9666294]
